# Supplementary material
Source: Springer Nature journal article supplement (https://www.springermedizin.de/resource/supplementary/13020_2014_211_MOESM2_ESM.pdf/9641216)

(A)

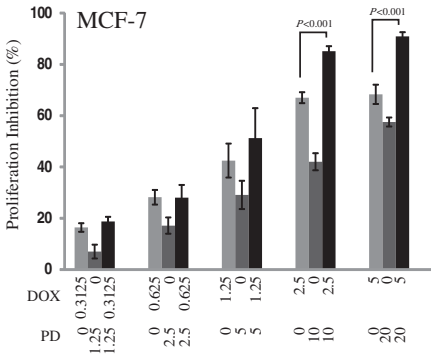

(B)

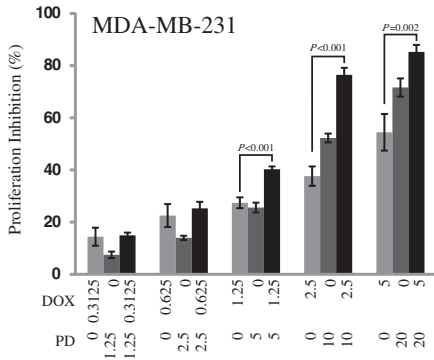

Supplement: MOESM2 [file 9641216]
